# Supplementary material for: Electromechanical Conditioning of Adult Progenitor Cells Improves Recovery of Cardiac Function After Myocardial Infarction
Source: PubMed Central journal article supplement (PMC5442794; doi:10.5966/sctm.2016-0079), 2016-09-29
Supplement: SCT3-6-0970-s001.pdf [file SCT3-6-0970-s001.pdf]

Supplemental Information - Bayes-Genis et al.

Supplementary Movie. Electro-Mechanical device stimulating ATDPCs.

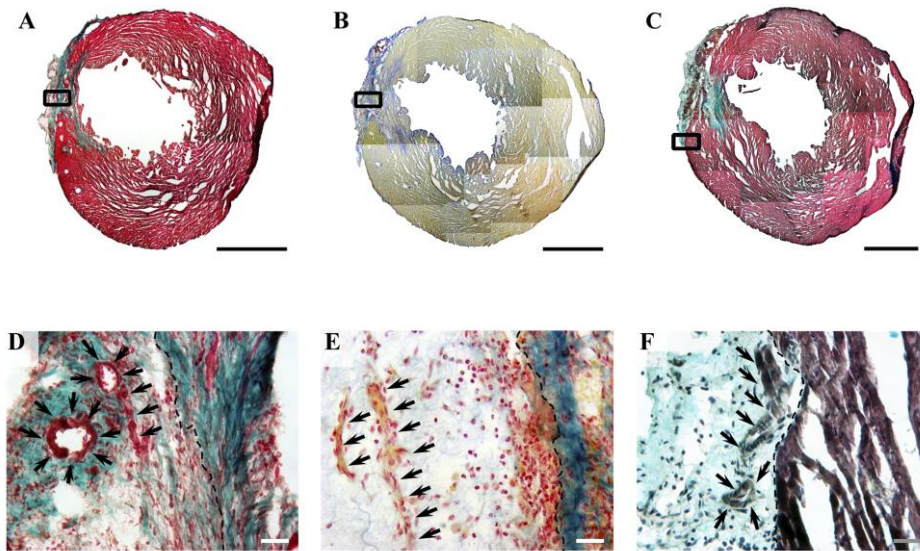

**Fig. S1. Histological stainings of MI+EMC heart cross-sections.** Light green Masson's trichromic (A, D), Gallego's modified trichromic (B, E), and Movat's pentachromic (C, F) stainings of whole heart cross-sections (upper panels) and magnified fibrin-myocardium interphase showing the vascular structures inside (lower panels). Arrowheads indicate vessels within the fibrin construct. Scale bars = 1 mm (A-C) and 20 μm (D-F).

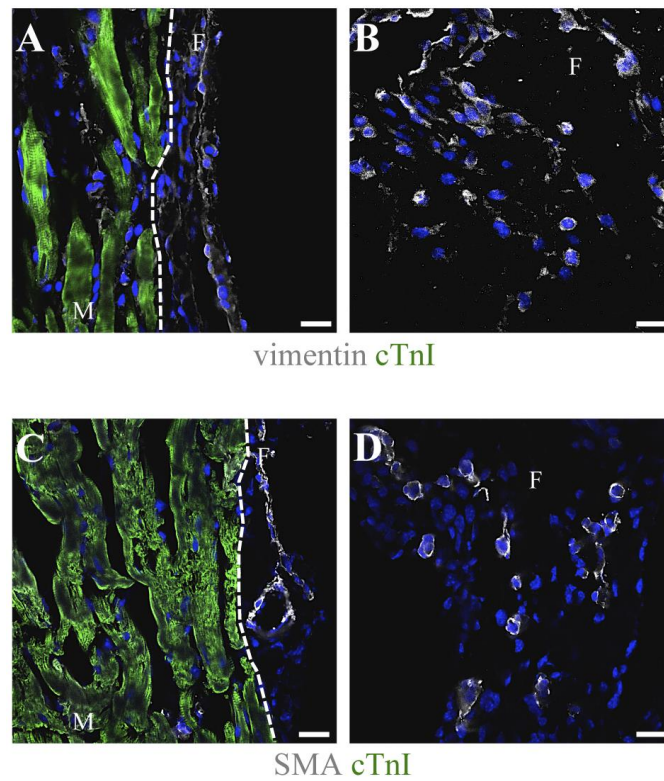

**Fig. S2. Immunohistochemistry to assess cell migration from the myocardium to the fibrin patch.** Immunofluorescent staining of heart cross-sections in MI+Fibrin animals for cTnI (green), vimentin (grey, upper panels), and SMA (grey, lower panels) in the myocardium-fibrin interphase (**A, C**) and inside the fibrin patch (**B, D**). Nuclei were counterstained with DAPI (blue). Fibrin = F, Myocardium = M. Scale bars = 20  $\mu\text{m}$ .

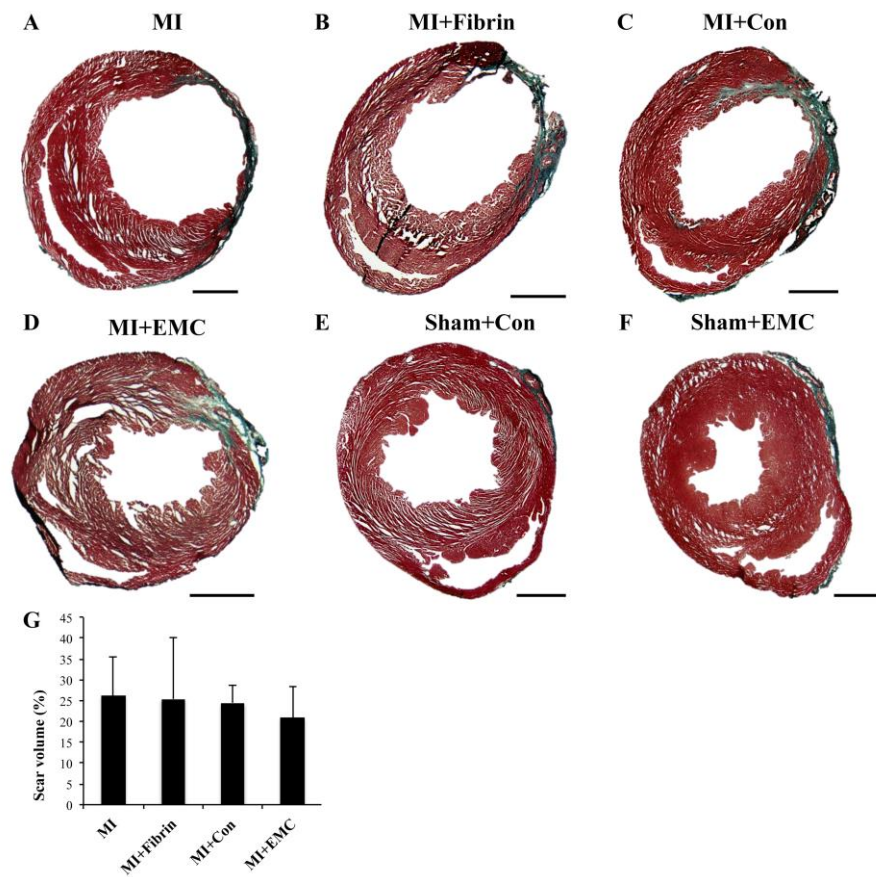

**Fig. S3. Morphometric analysis.** Representative Masson's trichrome staining of heart cross-section from each animal group: MI (A), MI+Fibrin (B), MI+Con (C), MI+EMC (D), Sham+Con (E), and Sham+EMC (F). Scale bars = 1 mm. (G) Scar volume percentages for all infarcted groups. Values are mean  $\pm$  SEM.



**Table S1.** Cardiac function parameters.

|            | Sham+Con |               |                | Sham+EMC |               |                | MI       |               |                | MI+Fibrin |               |                | MI+Con   |               |                | MI+EMC   |               |                |
|------------|----------|---------------|----------------|----------|---------------|----------------|----------|---------------|----------------|-----------|---------------|----------------|----------|---------------|----------------|----------|---------------|----------------|
|            | Baseline | Pre-Sacrifice | <i>P</i> value | Baseline | Pre-Sacrifice | <i>P</i> value | Baseline | Pre-Sacrifice | <i>P</i> value | Baseline  | Pre-Sacrifice | <i>P</i> value | Baseline | Pre-Sacrifice | <i>P</i> value | Baseline | Pre-Sacrifice | <i>P</i> value |
| LVAWd (mm) | 0.9±0.2  | 0.9±0.1       | 0.64           | 0.8±0.1  | 0.8±0.1       | 0.68           | 0.8±0.1  | 0.8±0.1       | 0.18           | 0.9±0.1   | 0.8±0.1       | 0.31           | 0.9±0.   | 0.8±0.1       | 0.55           | 0.7±0.2  | 0.8±0.1       | 0.28           |
| LVAWs (mm) | 1.0±0.2  | 1.2±0.2       | 0.36           | 1.0±0.1  | 1.2±0.2       | 0.46           | 1.1±0.2  | 1.1±0.2       | 0.70           | 1.2±0.2   | 1.1±0.2       | 0.31           | 1.1±0.2  | 1.1±0.1       | 0.52           | 1.0±0.2  | 1.1±0.1       | 0.20           |
| LVPWd (mm) | 0.8±0.1  | 0.8±0.1       | 0.41           | 1.0±0.1  | 1.0±0.1       | 0.69           | 0.8±0.1  | 1.0±0.2       | 0.09           | 0.7±0.2   | 0.9±0.1       | 0.18           | 0.7±0.1  | 0.8±0.3       | 0.45           | 0.7±0.1  | 0.8±0.1       | 0.10           |
| LVPWs (mm) | 1.2±0.2  | 1.0±0.2       | 0.06           | 1.3±0.2  | 1.3±0.2       | 0.96           | 1.1±0.2  | 1.1±0.2       | 0.58           | 1.1±0.2   | 1.0±0.1       | 0.77           | 1.0±0.1  | 1.1±0.3       | 0.59           | 0.9±0.1  | 1.1±0.1       | 0.02*          |

Values are shown as mean ± SEM. LVAWd: left ventricle anterior wall thickness diastole; LVAWs: left ventricle anterior wall thickness systole; LVPWd: left ventricle posterior wall thickness diastole; LVPWs: left ventricle posterior wall thickness systole.

**Table S1. Cardiac function parameters.** Values are shown as mean  $\pm$  SEM. \* $P < 0.05$ . LVAWTd, left ventricle anterior wall thickness diastole; LVAWTs left ventricle anterior wall thickness systole; LVPWTd, left ventricle posterior wall thickness diastole; LVPWTs, left ventricle posterior wall thickness systole.

**Table S2.** Left ventricle ejection fraction calculated as differentials between values at 21 days post-operation and baseline.

|                  | $\Delta$ LVEF (%) | <i>P</i> values |
|------------------|-------------------|-----------------|
| <b>MI</b>        | -15±8             |                 |
| <b>MI+Fibrin</b> | -11±8             | 0.56            |
| <b>MI+Con</b>    | -3±8              | 0.23            |
| <b>MI+EMC</b>    | 0±7               | 0.03*           |

Values are shown as the differentials in percentage  $\pm$  SEM. LVEF: left ventricle ejection fraction. \* $P < 0.05$ ; *P* values are referred to MI group.

**Table S2. Left ventricle ejection fraction calculated as differentials between values at pre-sacrifice (21 days post-operation) and baseline.** Values are shown as the differentials in percentage  $\pm$  SEM.

LVEF, left ventricle ejection fraction. \* $P < 0.05$ ;  $P$  values are referred to MI group.
